# Supplementary material for: Incidence and survival of neuroendocrine neoplasia in England 1995–2018: A retrospective, population-based study
Source: PubMed Central journal article supplement (PMC9513765; doi:10.1016/j.lanepe.2022.100510), 2022-09-23
Supplement: mmc1.pdf [file mmc1.pdf]

**(A) Morphology**

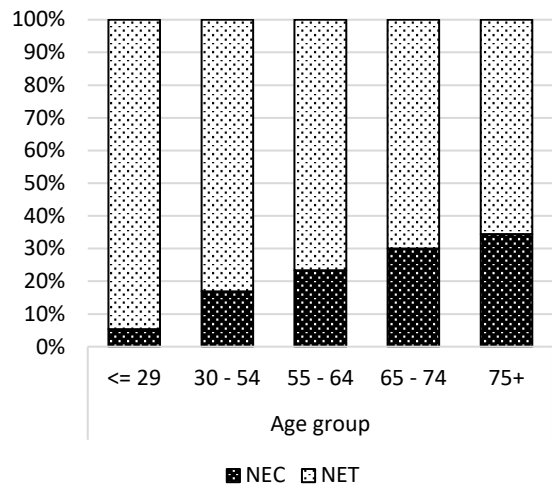

**(B) Stage**

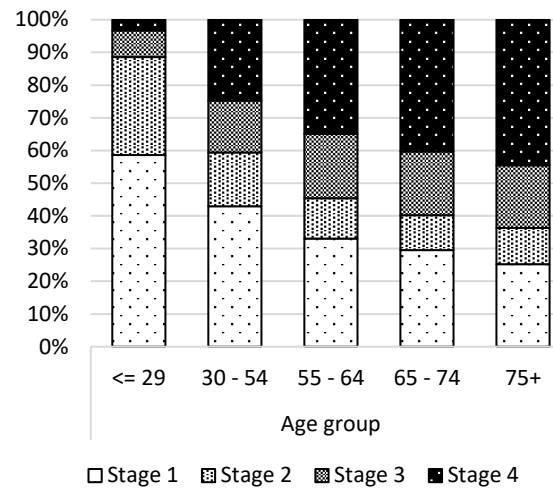

**Supplementary Figure 1.** Age group stratification of 14,834 neuroendocrine neoplasia between 2012-2018 by (A) morphology and (B) stage.
