# Supplementary material for: Incidence and survival of neuroendocrine neoplasia in England 1995–2018: A retrospective, population-based study
Source: PubMed Central journal article supplement (PMC9513765; doi:10.1016/j.lanepe.2022.100510), 2022-09-23
Supplement: mmc2.pdf [file mmc2.pdf]

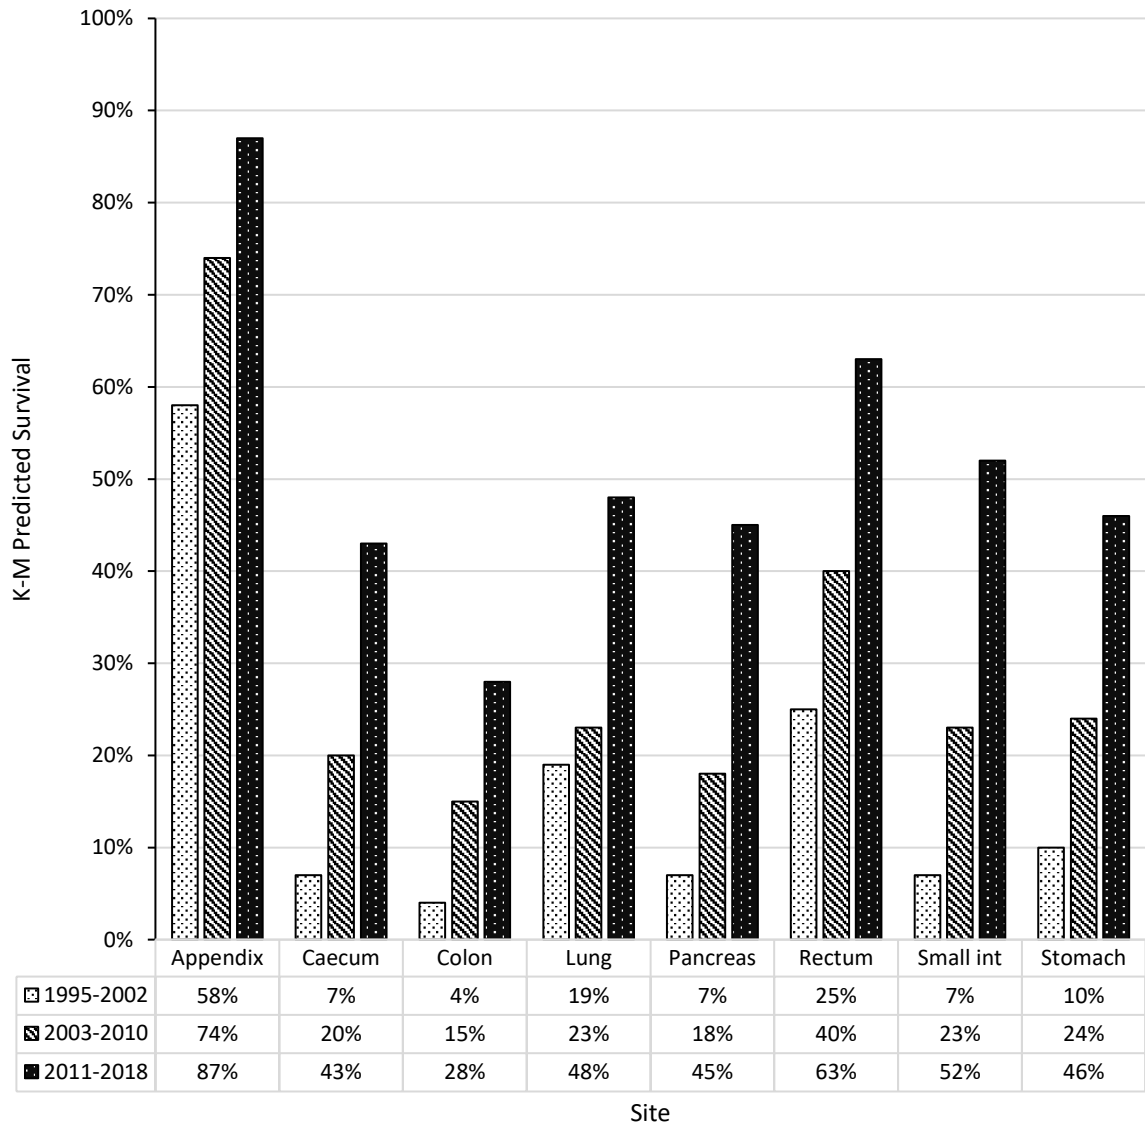

**Supplementary Figure 2.** Kaplan-Meier predicted 5-year survival of 40,534 neuroendocrine tumours by site over time from 1995–2018 in England.
